# Supplementary material for: Effects of Freeze-Thaw Cycles on Gel-Forming Ability and Protein Denaturation in Alaska Pollock Frozen Surimi
Source: Hindawi journal article supplement (doi:10.1155/2019/3760368), 2019-07-07

| Breaking strength (gf) |                  |     |      |      |      |      |
|------------------------|------------------|-----|------|------|------|------|
| con                    | Setting time (h) | 0   | 3    | 6    | 12   | 24   |
|                        |                  | 494 | 1045 | 1188 | 1237 | 1059 |
|                        |                  | 361 | 991  | 1232 | 1327 | 1739 |
|                        |                  | 405 | 811  | 1153 | 1315 | 1438 |
|                        |                  | 322 | 986  |      | 1374 | 1397 |
|                        |                  | 497 | 832  | 1199 | 1206 | 1191 |
|                        |                  | 496 | 908  | 1170 |      | 1385 |
|                        | avg.             | 429 | 929  | 1188 | 1292 | 1368 |
|                        | std.             | 70  | 86   | 27   | 61   | 212  |
| 1st F-T                | Setting time (h) | 0   | 3    | 6    | 12   | 24   |
|                        |                  | 356 | 718  | 912  | 1029 | 1106 |
|                        |                  | 423 | 656  | 626  | 990  | 1273 |
|                        |                  | 387 | 717  | 724  | 989  | 1223 |
|                        |                  | 415 | 746  | 816  | 1176 | 949  |
|                        |                  | 427 | 643  | 700  | 875  | 981  |
|                        |                  | 362 |      | 827  | 988  | 1401 |
|                        |                  | 395 | 696  | 767  | 1008 | 1156 |
|                        | avg.             | 29  | 40   | 94   | 89   | 160  |
|                        | std.             |     |      |      |      |      |
| 2nd F-T                | Setting time (h) | 0   | 3    | 6    | 12   | 24   |
|                        |                  | 352 | 694  | 633  | 1056 | 1194 |
|                        |                  | 344 | 622  | 901  | 1034 | 1281 |
|                        |                  | 362 | 601  | 967  |      | 971  |
|                        |                  | 349 | 596  | 923  |      | 1203 |
|                        |                  | 394 | 699  | 712  | 1125 | 1053 |
|                        |                  | 328 | 614  | 837  | 1020 | 1237 |
|                        |                  | 355 | 637  | 829  | 1059 | 1157 |
|                        | avg.             | 20  | 43   | 119  | 40   | 109  |
|                        | std.             |     |      |      |      |      |

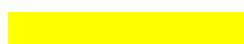 error value

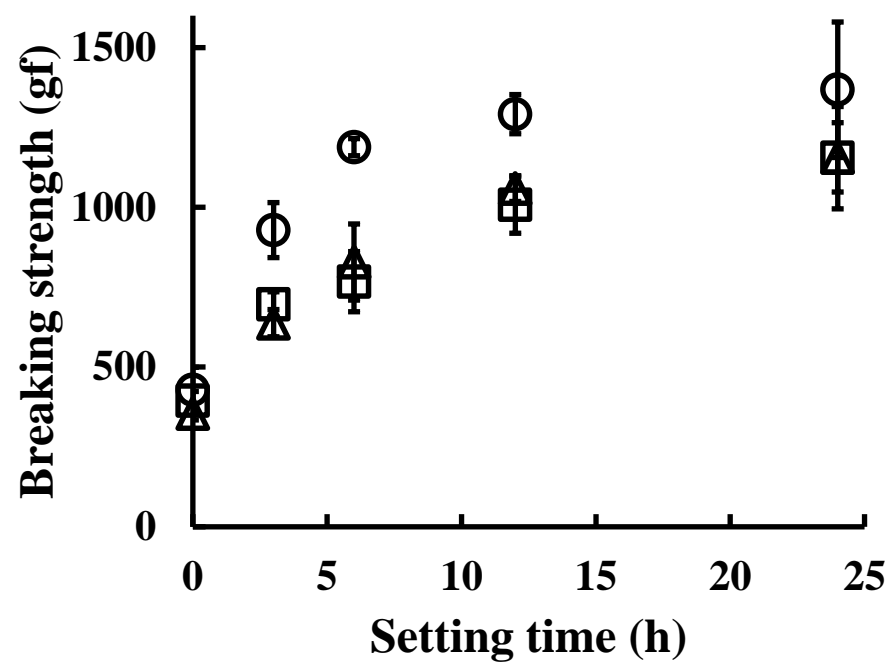

Supplement: f1 [file 3760368.f1.zip › S-Figure 3(a) Breaking stength raw data (Double heated gel).pdf]
