# Supplementary material for: Effects of Freeze-Thaw Cycles on Gel-Forming Ability and Protein Denaturation in Alaska Pollock Frozen Surimi
Source: Hindawi journal article supplement (doi:10.1155/2019/3760368), 2019-07-07
Supplement: f1 [file 3760368.f1.zip]

| Control  |        | Suwari gel |          |        |      |          |        |     |          |        |     |          |        |     |
|----------|--------|------------|----------|--------|------|----------|--------|-----|----------|--------|-----|----------|--------|-----|
| 0h       |        |            | 3h       |        |      | 6h       |        |     | 12h      |        |     | 24h      |        |     |
| Peak No. | O.D    | %          | Peak No. | O.D    | %    | Peak No. | O.D    | %   | Peak No. | O.D    | %   | Peak No. | O.D    | %   |
| 1        | 898.6  |            | 1        | 3534.0 |      | 1        | 2628.0 |     | 1        | 2578.2 |     | 1        | 1476.6 |     |
| 2        | 373.7  |            | 2        | 356.0  |      | 2        | 264.9  |     | 2        | 524.0  |     | 2        | 812.1  |     |
| 3        | 654.2  |            | 3        | 1174.9 | 12.0 | 3        | 634.7  | 7.4 | 3        | 250.6  | 2.6 | 3        | 121.0  | 1.4 |
| 4        | 2878.5 | 31.5       | 4        | 91.1   |      | 4        | 628.7  | 7.4 | 4        | 894.0  | 9.2 | 4        | 800.3  | 9.1 |
| 5        | 341.3  | 3.7        | 5        | 545.5  | 5.6  | 5        | 114.1  |     | 5        | 160.1  |     | 5        | 203.1  |     |
| 6        | 91.0   |            | 6        | 77.9   |      | 6        | 299.2  |     | 6        | 387.9  |     | 6        | 85.6   |     |
| 7        | 218.3  |            | 7        | 230.7  |      | 7        | 196.7  |     | 7        | 111.4  |     | 7        | 371.3  |     |
| 8        | 256.4  |            | 8        | 293.9  |      | 8        | 3170.2 |     | 8        | 3966.3 |     | 8        | 134.4  |     |
| 9        | 2927.5 |            | 9        | 3065.8 |      | 9        | 590.9  |     |          | 847.6  |     | 9        | 3935.7 |     |
| 10       | 512.6  |            |          | 456.0  |      |          |        |     |          |        |     |          | 843.5  |     |
| SUM      | 9152.1 |            |          | 9825.7 |      |          | 8527.5 |     |          | 9720.2 |     |          | 8783.6 |     |

Setting tin MHC (%)    Residual rate(%)    150 kDa(%)

|     |      |       |     |        |
|-----|------|-------|-----|--------|
| 0h  | 31.5 | 100.0 | 3.7 | MHC    |
| 3h  | 12.0 | 38.0  | 5.6 | 150kDa |
| 6h  | 7.4  | 23.7  | 7.4 |        |
| 12h | 2.6  | 8.2   | 9.2 |        |
| 24h | 1.4  | 4.4   | 9.1 |        |

1st F-T Suwari gel

| 0h       |          |      | 3h       |        |      | 6h       |        |     | 12h      |        |      | 24h      |        |     |
|----------|----------|------|----------|--------|------|----------|--------|-----|----------|--------|------|----------|--------|-----|
| Peak No. | O.D      | %    | Peak No. | O.D    | %    | Peak No. | O.D    | %   | Peak No. | O.D    | %    | Peak No. | O.D    | %   |
| 1        | 2211.9   |      | 1        | 3760.2 |      | 1        | 3618.4 |     | 1        | 3439.2 |      | 1        | 1591.9 |     |
| 2        | 310.6    |      | 2        | 91.3   |      | 2        | 1236.7 |     | 2        | 1188.8 |      | 2        | 1064.2 |     |
| 3        | 1218.5   |      | 3        | 78.7   |      | 3        | 1178.6 | 8.5 | 3        | 473.7  | 3.1  | 3        | 217.8  | 1.6 |
| 4        | 7009.2   | 37.2 | 4        | 133.8  |      | 4        | 1126.3 | 8.1 | 4        | 1631.1 | 10.7 | 4        | 1295.2 | 9.3 |
| 5        | 444.5    | 2.4  | 5        | 50.5   |      | 5        | 107.1  |     | 5        | 281.4  |      | 5        | 376.0  |     |
| 6        | 172.4    |      | 6        | 2911.6 | 20.3 | 6        | 355.7  |     | 6        | 439.2  |      | 6        | 470.9  |     |
| 7        | 444.5    |      | 7        | 932.0  | 6.5  | 7        | 244.2  |     | 7        | 194.7  |      | 7        | 230.0  |     |
| 8        | 432.2    |      | 8        | 100.7  |      | 8        | 4697.5 |     | 8        | 128.3  |      | 8        | 6513.8 |     |
| 9        | 5306.5   |      | 9        | 342.7  |      | 9        | 1327.6 |     | 9        | 5701.1 |      | 9        | 2145.3 |     |
| 10       | 1274.4   |      | 10       | 356.9  |      |          |        |     | 10       | 1703.8 |      |          |        |     |
|          |          |      | 11       | 81.2   |      |          |        |     |          |        |      |          |        |     |
|          |          |      | 12       | 4375.8 |      |          |        |     |          |        |      |          |        |     |
|          |          |      | 13       | 1115.5 |      |          |        |     |          |        |      |          |        |     |
| SUM      | 18824.75 |      | 14331.13 |        |      | 13892.3  |        |     | 15181.3  |        |      | 13905.17 |        |     |

Setting tin MHC (%) Residual rate(%) 150 kDa(%)

|     |      |       |      |        |
|-----|------|-------|------|--------|
| 0h  | 37.2 | 100.0 | 2.4  | MHC    |
| 3h  | 20.3 | 54.6  | 6.5  | 150kDa |
| 6h  | 8.5  | 22.8  | 8.1  |        |
| 12h | 3.1  | 8.4   | 10.7 |        |
| 24h | 1.6  | 4.2   | 9.3  |        |

2nd F-T Suwari gel

| 0h       |          |      | 3h       |        |      | 6h       |        |      | 12h      |        |      | 24h      |        |      |
|----------|----------|------|----------|--------|------|----------|--------|------|----------|--------|------|----------|--------|------|
| Peak No. | O.D      | %    | Peak No. | O.D    | %    | Peak No. | O.D    | %    | Peak No. | O.D    | %    | Peak No. | O.D    | %    |
| 1        | 2289.2   |      | 1        | 2725.5 |      | 1        | 2647.8 |      | 1        | 2615.8 |      | 1        | 3101.2 |      |
| 2        | 925.5    |      | 2        | 624.1  |      | 2        | 673.2  |      | 2        | 507.0  |      | 2        | 552.8  |      |
| 3        | 6732.1   | 40.0 | 3        | 506.0  |      | 3        | 2779.4 | 19.6 | 3        | 57.8   |      | 3        | 476.0  | 3.5  |
| 4        | 535.6    | 3.2  | 4        | 5298.2 | 29.1 | 4        | 1517.1 | 10.7 | 4        | 933.6  | 8.9  | 4        | 1787.9 | 13.0 |
| 5        | 198.8    |      | 5        | 1264.5 | 6.9  | 5        | 238.9  |      | 5        | 1373.1 | 13.2 | 5        | 480.3  |      |
| 6        | 751.7    |      | 6        | 231.7  |      | 6        | 451.2  |      | 6        | 228.8  |      | 6        | 587.3  |      |
| 7        | 4216.7   |      | 7        | 623.4  |      | 7        | 705.1  |      | 7        | 426.3  |      | 7        | 439.5  |      |
| 8        | 1168.9   |      | 8        | 592.3  |      | 8        | 3933.9 |      | 8        | 3323.4 |      | 8        | 120.7  |      |
|          |          |      | 9        | 4790.3 |      | 9        | 1252.7 |      | 9        | 974.7  |      | 9        | 4955.2 |      |
|          |          |      | 10       | 1572.6 |      |          |        |      |          |        |      | 10       | 1236.0 |      |
| SUM      | 16818.57 |      | 18228.72 |        |      | 14199.25 |        |      | 10440.52 |        |      | 13737    |        |      |

| Setting tin MHC (%) | Residual rate(%) | 150 kDa(%) | MHC  |
|---------------------|------------------|------------|------|
| 0h                  | 40.02768         | 100.0      | 3.2  |
| 3h                  | 29.06516         | 72.6       | 6.9  |
| 6h                  | 19.57411         | 48.9       | 10.7 |
| 12h                 | 8.941866         | 22.3       | 13.2 |
| 24h                 | 3.465401         | 8.7        | 13.0 |
