# Supplementary material for: Effects of Freeze-Thaw Cycles on Gel-Forming Ability and Protein Denaturation in Alaska Pollock Frozen Surimi
Source: Hindawi journal article supplement (doi:10.1155/2019/3760368), 2019-07-07
Supplement: f1 [file 3760368.f1.zip]

| Con |     |     |
|-----|-----|-----|
| Gs  |     | BS  |
|     | 142 | 197 |
|     | 134 | 172 |
|     | 163 | 213 |
|     | 169 | 218 |
|     | 171 | 231 |
|     | 248 | 365 |
|     | 239 | 400 |
|     | 291 | 572 |
|     | 276 | 490 |
|     | 264 | 459 |
|     | 276 | 516 |
|     | 394 | 779 |
|     | 343 | 591 |
|     | 356 | 606 |
|     | 399 | 778 |
|     | 414 | 814 |
|     | 326 | 505 |
|     | 456 | 795 |
|     | 516 | 991 |
|     | 417 | 639 |
|     | 419 | 638 |
|     | 475 | 938 |
|     | 465 | 831 |

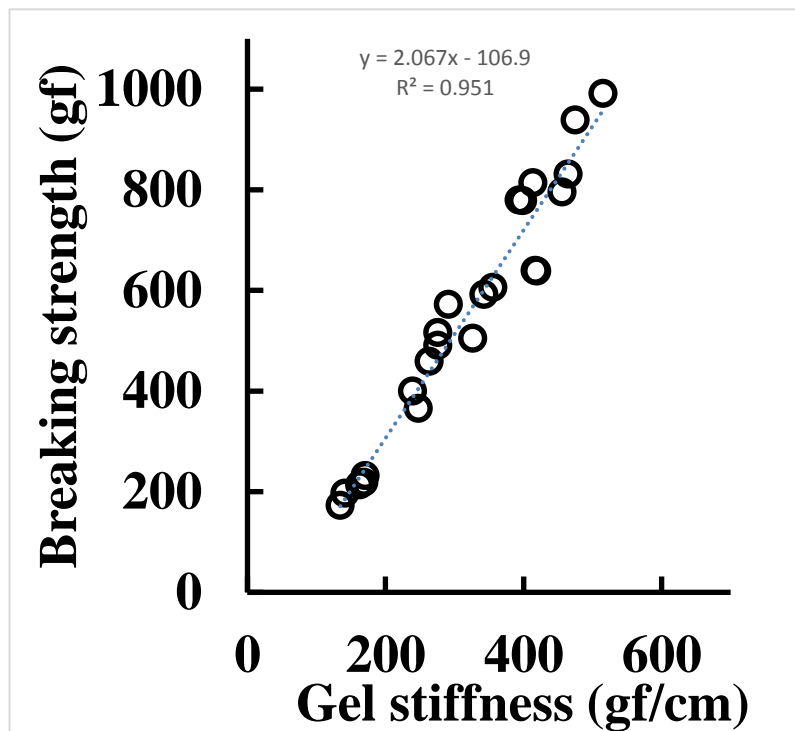

|            | x (Gs) | y (BS)                      |                                |
|------------|--------|-----------------------------|--------------------------------|
| Min        | 134    | 171                         | $y = 2.067 \times 134 - 106.9$ |
| Max        | 516    | 959                         | $y = 2.067 \times 516 - 106.9$ |
| Difference | 381    | 788                         |                                |
| L value    | 875    | $L = (381^2 + 788^2)^{0.5}$ |                                |

| 1st F-T |     |     |
|---------|-----|-----|
| Gs      |     | BS  |
|         | 124 | 124 |
|         | 129 | 124 |
|         | 135 | 119 |
|         | 130 | 119 |
|         | 116 | 119 |
|         | 198 | 330 |
|         | 198 | 297 |
|         | 196 | 329 |
|         | 205 | 344 |
|         | 180 | 252 |
|         | 184 | 320 |
|         | 291 | 525 |
|         | 245 | 413 |
|         | 295 | 495 |
|         | 309 | 533 |
|         | 319 | 582 |
|         | 276 | 435 |
|         | 375 | 644 |
|         | 341 | 576 |
|         | 298 | 426 |
|         | 383 | 699 |
|         | 416 | 782 |

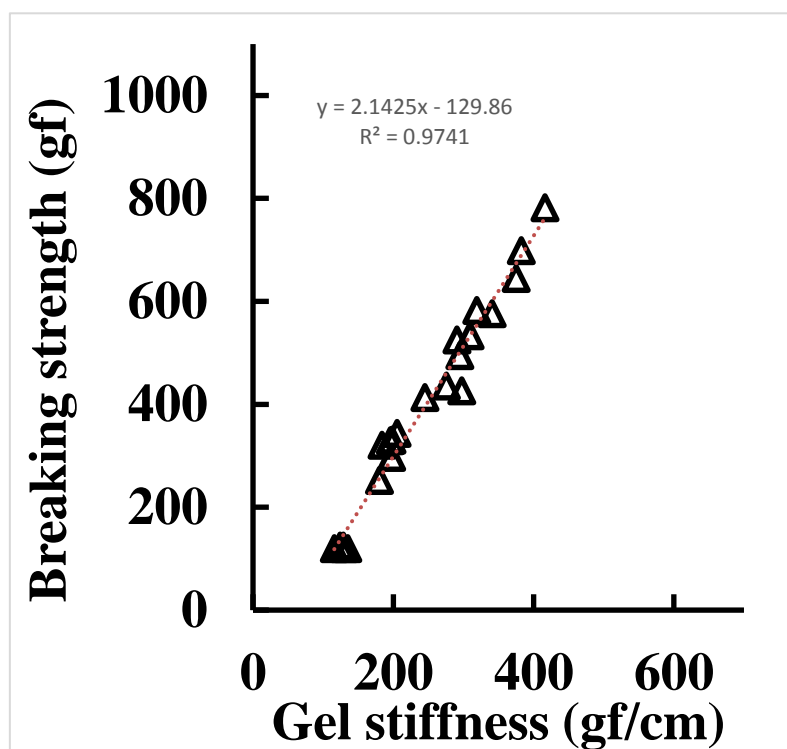

|            | x (Gs) | y (BS)                      |                                |
|------------|--------|-----------------------------|--------------------------------|
| Min        | 116    | 132                         | $y = 2.143 \times 116 - 129.9$ |
| Max        | 416    | 754                         | $y = 2.143 \times 416 - 129.9$ |
| Difference | 301    | 621                         |                                |
| L value    | 690    | $L = (301^2 + 621^2)^{0.5}$ |                                |

| 2nd F-T |     |  |
|---------|-----|--|
| Gs      | BS  |  |
| 116     | 98  |  |
| 115     | 94  |  |
| 114     | 95  |  |
| 126     | 96  |  |
| 119     | 99  |  |
| 187     | 305 |  |
| 184     | 265 |  |
| 164     | 223 |  |
| 183     | 286 |  |
| 181     | 281 |  |
| 176     | 273 |  |
| 242     | 412 |  |
| 281     | 492 |  |
| 298     | 570 |  |
| 286     | 506 |  |
| 234     | 374 |  |
| 260     | 428 |  |
| 337     | 574 |  |
| 317     | 564 |  |
| 356     | 669 |  |
| 326     | 531 |  |
| 350     | 604 |  |
| 327     | 524 |  |

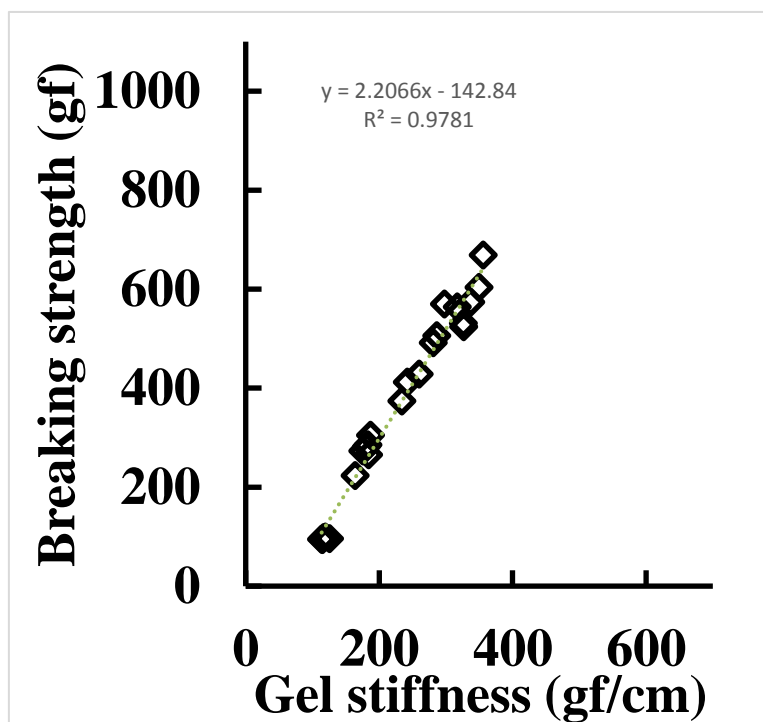

|            | x (Gs) | y (BS)                      |                                |
|------------|--------|-----------------------------|--------------------------------|
| Min        | 114    | 128                         | $y = 2.207 \times 114 - 142.8$ |
| Max        | 356    | 628                         | $y = 2.207 \times 628 - 142.8$ |
| Difference | 242    | 500                         |                                |
| L value    | 556    | $L = (242^2 + 500^2)^{0.5}$ |                                |
