# Supplementary material for: Effects of Freeze-Thaw Cycles on Gel-Forming Ability and Protein Denaturation in Alaska Pollock Frozen Surimi
Source: Hindawi journal article supplement (doi:10.1155/2019/3760368), 2019-07-07
Supplement: f1 [file 3760368.f1.zip]

| Gs  | BS   |
|-----|------|
| 430 | 494  |
| 395 | 361  |
| 401 | 405  |
| 356 | 322  |
| 430 | 497  |
| 439 | 496  |
| 650 | 1045 |
| 613 | 991  |
| 550 | 811  |
| 626 | 986  |
| 575 | 832  |
| 583 | 908  |
| 759 | 1188 |
| 738 | 1232 |
| 720 | 1153 |
| 724 | 1199 |
| 669 | 1170 |
| 738 | 1237 |
| 798 | 1327 |
| 840 | 1315 |
| 805 | 1374 |
| 760 | 1206 |
| 737 | 1059 |
| 999 | 1739 |
| 916 | 1438 |
| 893 | 1397 |
| 838 | 1191 |
| 909 | 1385 |

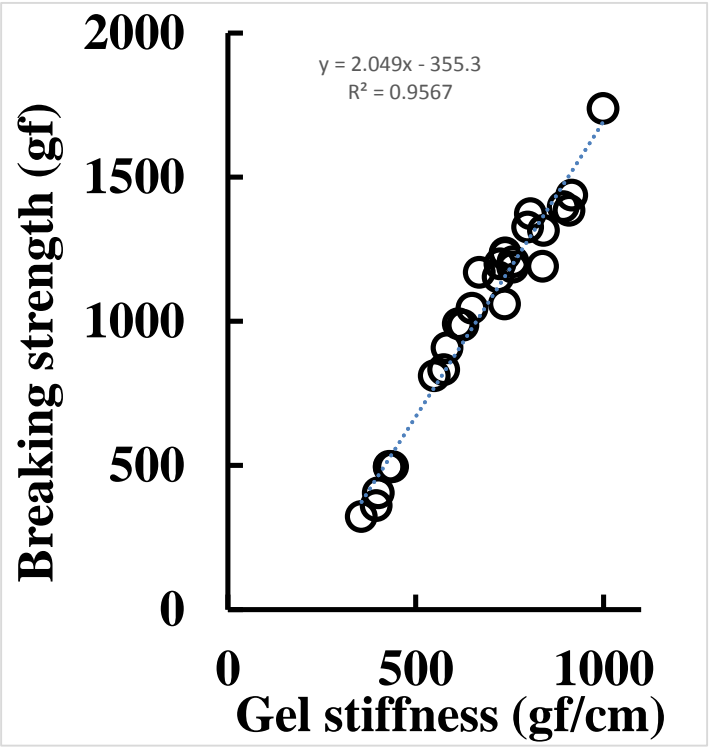

| Con        | x (Gs) | y (BS)                       |                                |
|------------|--------|------------------------------|--------------------------------|
| Min        | 356    | 373                          | $y = 2.049 \times 356 - 355.3$ |
| Max        | 999    | 1692                         | $y = 2.049 \times 999 - 355.3$ |
| Difference | 644    | 1319                         |                                |
| L value    | 1467   | $L = (644^2 + 1319^2)^{0.5}$ |                                |

| Gs  | BS   |
|-----|------|
| 404 | 356  |
| 434 | 423  |
| 424 | 387  |
| 438 | 415  |
| 447 | 427  |
| 386 | 362  |
| 569 | 718  |
| 532 | 656  |
| 544 | 717  |
| 564 | 746  |
| 517 | 643  |
| 592 | 912  |
| 469 | 626  |
| 545 | 724  |
| 575 | 816  |
| 534 | 700  |
| 589 | 827  |
| 645 | 1029 |
| 657 | 990  |
| 692 | 989  |
| 738 | 1176 |
| 621 | 875  |
| 667 | 988  |
| 751 | 1106 |
| 788 | 1273 |
| 794 | 1223 |
| 675 | 949  |
| 678 | 981  |
| 807 | 1401 |

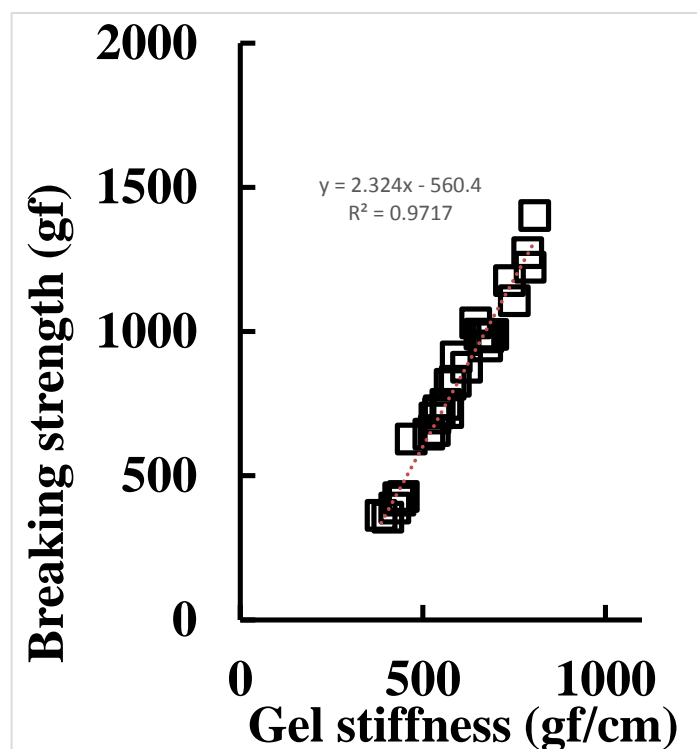

1st F-T

|            | x (Gs) | y (BS) |                                |
|------------|--------|--------|--------------------------------|
| Min        | 386    | 337    | $y = 2.324 \times 807 - 560.4$ |
| Max        | 807    | 1315   | $y = 2.324 \times 386 - 560.4$ |
| Difference | 421    | 979    |                                |
| L value    | 1066   |        | $L = (421^2 + 979^2)^{0.5}$    |

| Gs  | BS   |
|-----|------|
| 405 | 352  |
| 404 | 344  |
| 410 | 362  |
| 392 | 349  |
| 425 | 394  |
| 400 | 328  |
| 527 | 694  |
| 486 | 622  |
| 501 | 601  |
| 509 | 596  |
| 545 | 699  |
| 519 | 614  |
| 472 | 633  |
| 605 | 901  |
| 640 | 967  |
| 611 | 923  |
| 516 | 712  |
| 557 | 837  |
| 671 | 1056 |
| 665 | 1034 |
| 716 | 1125 |
| 663 | 1020 |
| 758 | 1194 |
| 772 | 1281 |
| 697 | 971  |
| 768 | 1203 |
| 719 | 1053 |
| 788 | 1237 |

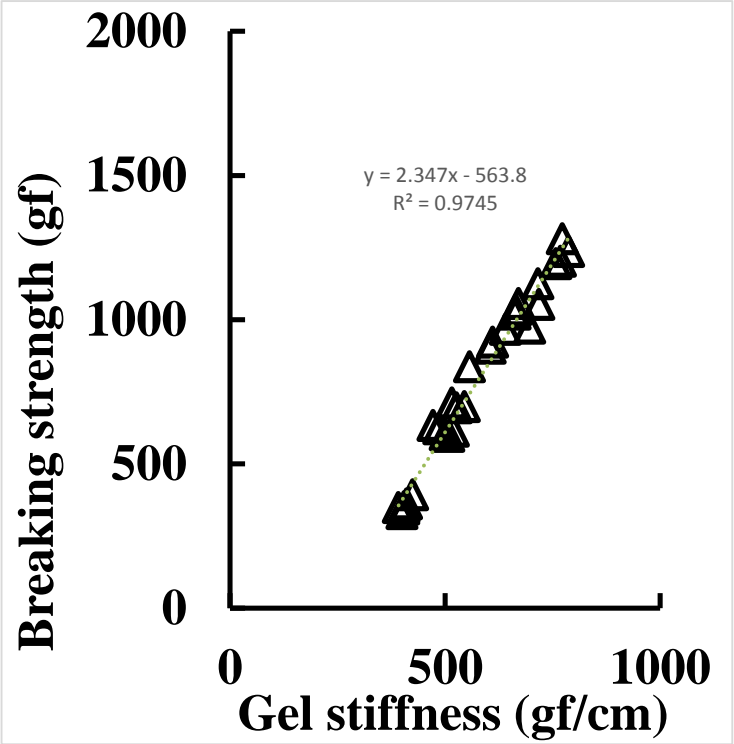

|            |        |                             |                                |
|------------|--------|-----------------------------|--------------------------------|
| 2nd F-T    |        |                             |                                |
|            | x (Gs) | y (BS)                      |                                |
| Min        | 400    | 376                         | $y = 2.347 \times 400 - 563.8$ |
| Max        | 772    | 1249                        | $y = 2.347 \times 772 - 563.8$ |
| Difference | 372    | 873                         |                                |
| L value    | 949    | $L = (372^2 + 873^2)^{0.5}$ |                                |
