# Supplementary material for: Effects of Freeze-Thaw Cycles on Gel-Forming Ability and Protein Denaturation in Alaska Pollock Frozen Surimi
Source: Hindawi journal article supplement (doi:10.1155/2019/3760368), 2019-07-07

|         |          |
|---------|----------|
| Control |          |
| No.1    | 0.196343 |
| No.2    | 0.14828  |
| No.3    | 0.167505 |
| No.4    | 0.167505 |
| No.5    | 0.185357 |
| No.6    | 0.119445 |
| avg.    | 0.164073 |
| std.    | 0.02503  |

|                           |          |
|---------------------------|----------|
| 1 <sup>st</sup> F-T cycle |          |
| No.1                      | 0.067873 |
| No.2                      | 0.075896 |
| No.3                      | 0.120335 |
| No.4                      | 0.113545 |
| No.5                      | 0.131446 |
| No.6                      | 0.144409 |
| avg.                      | 0.108917 |
| std.                      | 0.02797  |

|                           |          |
|---------------------------|----------|
| 2 <sup>nd</sup> F-T cycle |          |
| No.1                      | 0.071332 |
| No.2                      | 0.073185 |
| No.3                      | 0.095421 |
| No.4                      | 0.071332 |
| No.5                      | 0.071332 |
| No.6                      | 0.071332 |
| avg.                      | 0.075655 |
| std.                      | 0.008865 |

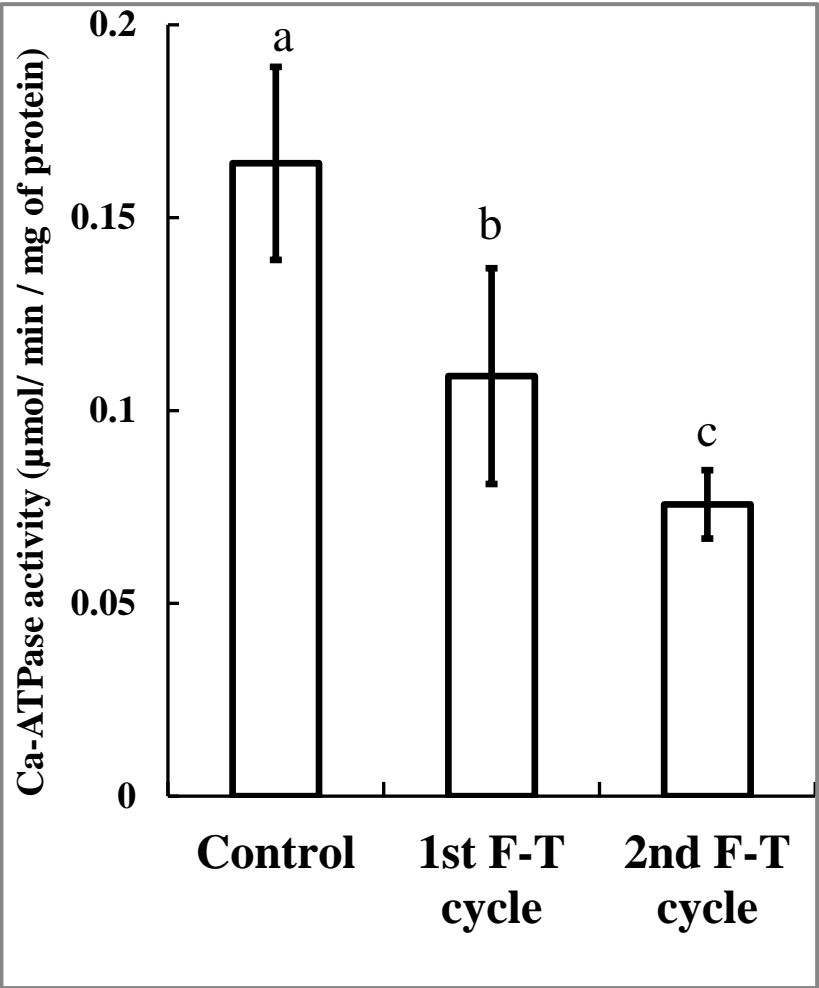

Supplement: f1 [file 3760368.f1.zip]
