# Supplementary material for: Effects of Freeze-Thaw Cycles on Gel-Forming Ability and Protein Denaturation in Alaska Pollock Frozen Surimi
Source: Hindawi journal article supplement (doi:10.1155/2019/3760368), 2019-07-07

| Breaking strength (gf) |                  |      |     |     |     |
|------------------------|------------------|------|-----|-----|-----|
| con                    | Setting time (h) | 3    | 6   | 12  | 24  |
|                        |                  | 197  | 365 | 779 | 795 |
|                        |                  | 172  | 400 | 591 | 991 |
|                        |                  | 213  | 572 | 606 | 639 |
|                        |                  | 218  | 490 | 778 | 638 |
|                        |                  | 231  | 459 | 814 | 938 |
|                        |                  |      | 516 | 505 | 831 |
|                        | avg.             | 206  | 467 | 679 | 806 |
|                        | std.             | 20   | 69  | 116 | 134 |
|                        |                  |      |     |     |     |
| 1st F-T                | Setting time (h) | 3    | 6   | 12  | 24  |
|                        |                  | 124  | 330 | 525 | 644 |
|                        |                  |      | 297 | 413 | 576 |
|                        |                  | 124  | 329 | 495 | 426 |
|                        |                  | 119  | 344 | 533 | 699 |
|                        |                  | 119  | 252 | 582 | 782 |
|                        |                  | 119  | 320 | 435 |     |
|                        | avg.             | 121  | 312 | 497 | 625 |
|                        | std.             | 2    | 30  | 58  | 120 |
|                        |                  |      |     |     |     |
| 2nd F-T                | Setting time (h) | 3    | 6   | 12  | 24  |
|                        |                  | 97.9 | 305 | 412 | 574 |
|                        |                  | 93.8 | 265 | 492 | 564 |
|                        |                  | 94.8 | 223 | 570 | 669 |
|                        |                  | 95.9 | 286 | 506 | 531 |
|                        |                  |      | 281 | 374 | 604 |
|                        |                  | 98.9 | 273 | 428 | 524 |
|                        | avg.             | 96.3 | 272 | 464 | 578 |
|                        | std.             | 1.9  | 25  | 66  | 49  |
|                        |                  |      |     |     |     |

 error value

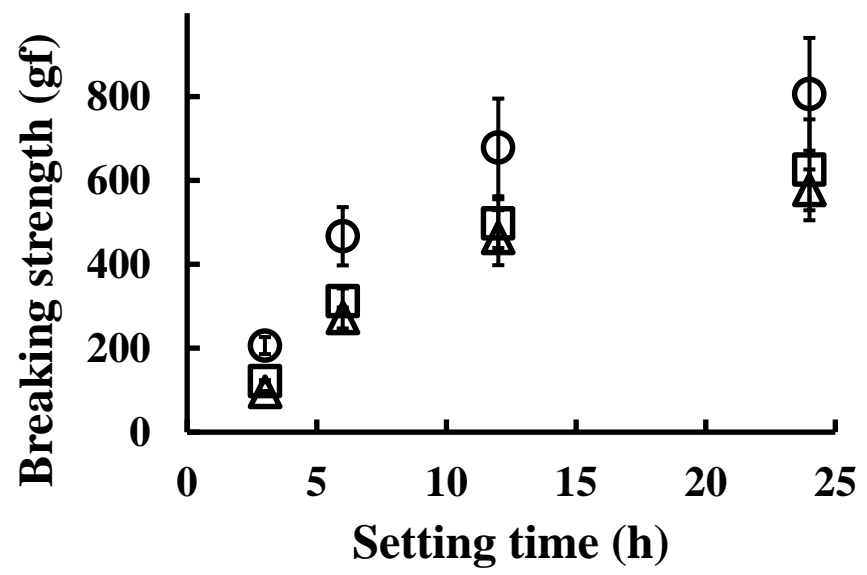

Supplement: f1 [file 3760368.f1.zip]
