# Supplementary material for: Effects of Freeze-Thaw Cycles on Gel-Forming Ability and Protein Denaturation in Alaska Pollock Frozen Surimi
Source: Hindawi journal article supplement (doi:10.1155/2019/3760368), 2019-07-07
Supplement: f1 [file 3760368.f1.zip]

1st F-T Suwari gel

| 0h       |         |      | 3h       |         |      | 6h       |         |      | 12h      |         |     | 24h      |         |      |
|----------|---------|------|----------|---------|------|----------|---------|------|----------|---------|-----|----------|---------|------|
| Peak No. | O.D     | %    | Peak No. | O.D     | %    | Peak No. | O.D     | %    | Peak No. | O.D     | %   | Peak No. | O.D     | %    |
| 1        | 3447.2  |      | 1        | 9729.3  |      | 1        | 7731.1  |      | 1        | 43026.6 |     | 1        | 6237.9  |      |
| 2        | 920.6   |      | 2        | 8580.1  |      | 2        | 7079.7  |      | 2        | 6243.0  |     | 2        | 6361.9  |      |
| 3        | 213.6   |      | 3        | 11640.6 | 21.0 | 3        | 6850.7  | 14.2 | 3        | 280.5   |     | 3        | 1437.3  | 3.7  |
| 4        | 6271.0  |      | 4        | 3258.3  | 5.9  | 4        | 3444.1  | 7.1  | 4        | 4164.2  | 4.7 | 4        | 4528.7  | 11.7 |
| 5        | 20009.9 | 39.3 | 5        | 631.6   |      | 5        | 671.1   |      | 5        | 8241.1  | 9.2 | 5        | 1326.6  |      |
| 6        | 366.0   | 0.7  | 6        | 1492.8  |      | 6        | 1580.4  |      | 6        | 3180.7  |     | 6        | 671.1   |      |
| 7        | 289.6   |      | 7        | 3106.5  |      | 7        | 2662.9  |      | 7        | 340.3   |     | 7        | 86.2    |      |
| 8        | 1026.5  |      | 8        | 461.0   |      | 8        | 769.3   |      | 8        | 165.8   |     | 8        | 1432.5  |      |
| 9        | 2440.9  |      | 9        | 11586.7 |      | 9        | 12310.8 |      | 9        | 13545.9 |     | 9        | 612.6   |      |
| 10       | 198.0   |      | 10       | 4920.8  |      | 10       | 5195.5  |      | 10       | 9916.9  |     | 10       | 11122.3 |      |
| 11       | 116.9   |      |          |         |      |          |         |      |          |         |     | 11       | 4776.8  |      |
| 12       | 11006.2 |      |          |         |      |          |         |      |          |         |     |          |         |      |
| 13       | 4552.8  |      |          |         |      |          |         |      |          |         |     |          |         |      |
| SUM      | 50859.1 |      | 55407.9  |         |      | 48295.7  |         |      | 89105.1  |         |     | 38593.9  |         |      |

Setting tir MHC (%) Residual rate(%) 150 kDa(%)

|     |      |       |      |        |
|-----|------|-------|------|--------|
| 0h  | 39.3 | 100.0 | 0.7  | MHC    |
| 3h  | 21.0 | 53.4  | 5.9  | 150kDa |
| 6h  | 14.2 | 36.1  | 7.1  |        |
| 12h | 4.7  | 11.9  | 9.2  |        |
| 24h | 3.7  | 9.5   | 11.7 |        |

2nd F-T Suwari gel

| 0h       |         |      | 3h       |         |      | 6h       |         |      | 12h      |         |      | 24h      |         |      |
|----------|---------|------|----------|---------|------|----------|---------|------|----------|---------|------|----------|---------|------|
| Peak No. | O.D     | %    |
| 1        | 1377.7  |      | 1        | 2385.5  |      | 1        | 2390.0  |      | 1        | 5930.9  |      | 1        | 3912.4  |      |
| 2        | 135.0   |      | 2        | 1076.0  |      | 2        | 570.2   |      | 2        | 986.0   |      | 2        | 1172.7  |      |
| 3        | 1026.1  |      | 3        | 814.1   |      | 3        | 1210.0  |      | 3        | 82.6    |      | 3        | 583.0   | 3.6  |
| 4        | 7259.0  | 43.3 | 4        | 5828.1  | 30.4 | 4        | 68.8    |      | 4        | 1343.6  | 8.2  | 4        | 1963.5  | 12.3 |
| 5        | 465.8   | 2.8  | 5        | 1545.6  | 8.1  | 5        | 3476.9  | 20.4 | 5        | 1696.8  | 10.4 | 5        | 530.3   |      |
| 6        | 1263.0  |      | 6        | 283.4   |      | 6        | 1947.5  | 11.4 | 6        | 346.8   |      | 6        | 635.3   |      |
| 7        | 118.8   |      | 7        | 585.7   |      | 7        | 268.8   |      | 7        | 522.3   |      | 7        | 553.4   |      |
| 8        | 3946.4  |      | 8        | 555.1   |      | 8        | 592.5   |      | 8        | 411.1   |      | 8        | 4761.3  |      |
| 9        | 1184.5  |      | 9        | 4565.4  |      | 9        | 632.3   |      | 9        | 3685.9  |      | 9        | 1871.1  |      |
|          |         |      | 10       | 1525.3  |      | 10       | 4366.4  |      | 10       | 1314.4  |      |          |         |      |
|          |         |      |          |         |      | 11       | 1518.1  |      |          |         |      |          |         |      |
|          | 16776.2 |      |          | 19164.1 |      |          |         |      |          |         |      |          |         |      |
|          |         |      |          |         |      |          | 17041.5 |      |          | 16320.3 |      |          | 15983.1 |      |

| Setting tir MHC (%) | Residual rate(%) | 150 kDa(%) | MHC  |
|---------------------|------------------|------------|------|
| 0h                  | 43.3             | 100.0      | 2.8  |
| 3h                  | 30.4             | 70.3       | 8.1  |
| 6h                  | 20.4             | 47.2       | 11.4 |
| 12h                 | 6.0              | 13.8       | 10.4 |
| 24h                 | 3.6              | 8.4        | 12.3 |
