# Supplementary material for: Effects of Freeze-Thaw Cycles on Gel-Forming Ability and Protein Denaturation in Alaska Pollock Frozen Surimi
Source: Hindawi journal article supplement (doi:10.1155/2019/3760368), 2019-07-07

| Breaking strain (mm) |                  |      |      |      |      |
|----------------------|------------------|------|------|------|------|
| con                  | Setting time (h) | 3    | 6    | 12   | 24   |
|                      |                  | 13.9 | 14.7 | 19.8 | 17.4 |
|                      |                  | 12.8 | 16.7 | 17.2 | 19.2 |
|                      |                  | 13.1 | 19.6 | 17.0 | 15.3 |
|                      |                  | 12.9 | 17.8 | 19.5 | 15.2 |
|                      |                  | 13.6 | 17.4 | 19.7 | 19.7 |
|                      |                  |      | 18.7 | 15.5 | 17.9 |
|                      | avg.             | 13.3 | 17.5 | 18.1 | 17.5 |
|                      | std.             | 0.4  | 1.6  | 1.6  | 1.7  |
|                      |                  |      |      |      |      |
| 1st F-T              | Setting time (h) | 3    | 6    | 12   | 24   |
|                      |                  | 10.0 | 16.7 | 18.1 | 17.2 |
|                      |                  |      | 15.0 | 16.9 | 16.9 |
|                      |                  | 9.7  | 16.8 | 16.8 | 14.3 |
|                      |                  | 8.8  | 16.7 | 17.2 | 18.3 |
|                      |                  | 9.2  | 14.0 | 18.3 | 18.8 |
|                      |                  | 10.3 | 17.4 | 15.8 |      |
|                      | avg.             | 9.6  | 16.1 | 17.2 | 17.1 |
|                      | std.             | 0.5  | 1.2  | 0.8  | 1.5  |
|                      |                  |      |      |      |      |
| 2nd F-T              | Setting time (h) | 3    | 6    | 12   | 24   |
|                      |                  | 8.4  | 16.3 | 17.0 | 17.0 |
|                      |                  | 8.1  | 14.4 | 17.5 | 17.8 |
|                      |                  | 8.3  | 13.6 | 19.1 | 18.8 |
|                      |                  | 7.6  | 15.6 | 17.7 | 16.3 |
|                      |                  |      | 15.6 | 16.0 | 17.3 |
|                      |                  | 8.3  | 15.6 | 16.5 | 16.0 |
|                      | avg.             | 8.2  | 15.2 | 17.3 | 17.2 |
|                      | std.             | 0.3  | 0.9  | 1.0  | 0.9  |

 Error value

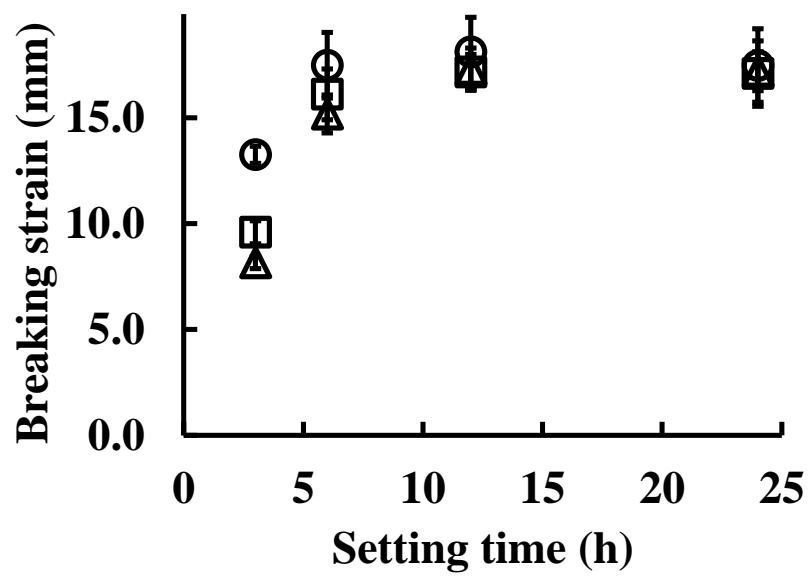

Supplement: f1 [file 3760368.f1.zip]
