# Supplementary material for: Effects of Freeze-Thaw Cycles on Gel-Forming Ability and Protein Denaturation in Alaska Pollock Frozen Surimi
Source: Hindawi journal article supplement (doi:10.1155/2019/3760368), 2019-07-07

| Breaking strain (mm) |                  |      |      |      |      |      |
|----------------------|------------------|------|------|------|------|------|
| con                  | Setting time (h) | 0    | 3    | 6    | 12   | 24   |
|                      |                  | 11.5 | 16.1 | 15.7 | 16.8 | 14.4 |
|                      |                  | 9.14 | 16.2 | 16.7 | 16.6 | 17.4 |
|                      |                  | 10.1 | 14.7 | 16.0 | 15.7 | 15.7 |
|                      |                  | 9.06 | 15.8 |      | 17.1 | 15.6 |
|                      |                  | 11.6 | 14.5 | 16.6 | 15.9 | 14.2 |
|                      |                  | 11.3 | 15.6 | 17.5 |      | 15.2 |
|                      | avg.             | 10.4 | 15.5 | 16.5 | 16.4 | 15.4 |
|                      | std.             | 1.1  | 0.6  | 0.6  | 0.5  | 1.0  |
|                      |                  |      |      |      |      |      |
| 1st F-T              | Setting time (h) | 0.0  | 3.0  | 6.0  | 12.0 | 24.0 |
|                      |                  | 8.80 | 12.6 | 15.4 | 15.9 | 14.7 |
|                      |                  | 9.74 | 12.3 | 13.4 | 15.1 | 16.2 |
|                      |                  | 9.14 | 13.2 | 13.3 | 14.3 | 15.4 |
|                      |                  | 9.48 | 13.2 | 14.2 | 15.9 | 14.1 |
|                      |                  | 9.56 | 12.4 | 13.1 | 14.1 | 14.5 |
|                      |                  | 9.38 |      | 14.0 | 14.8 | 17.4 |
|                      | avg.             | 9.35 | 12.8 | 13.9 | 15.0 | 15.4 |
|                      | std.             | 0.31 | 0.4  | 0.8  | 0.7  | 1.1  |
|                      |                  |      |      |      |      |      |
| 2nd F-T              | Setting time (h) | 0.0  | 3.0  | 6.0  | 12.0 | 24.0 |
|                      |                  | 8.68 | 13.2 | 13.4 | 15.7 | 15.8 |
|                      |                  | 8.50 | 12.8 | 14.9 | 15.6 | 16.6 |
|                      |                  | 8.82 | 12.0 | 15.1 |      | 13.9 |
|                      |                  | 8.90 | 11.7 | 15.1 |      | 15.7 |
|                      |                  | 9.26 | 12.8 | 13.8 | 15.7 | 14.7 |
|                      |                  | 8.20 | 11.8 | 15.0 | 15.4 | 15.7 |
|                      | avg.             | 8.73 | 12.4 | 14.6 | 15.6 | 15.4 |
|                      | std.             | 0.33 | 0.6  | 0.7  | 0.1  | 0.9  |

Erroe value

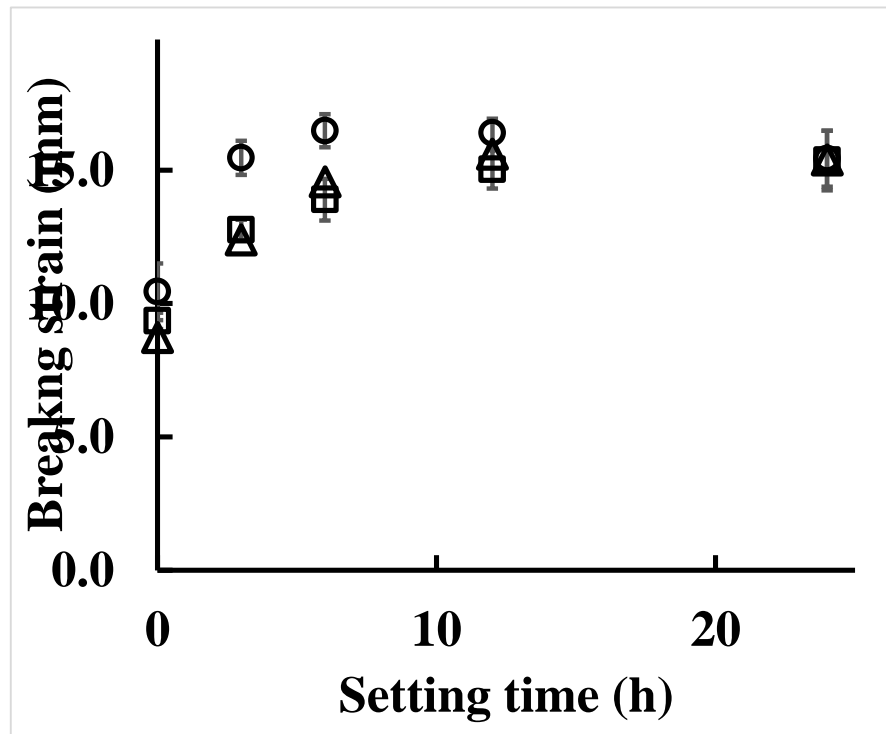

Supplement: f1 [file 3760368.f1.zip]
