# Supplementary material for: Effects of Freeze-Thaw Cycles on Gel-Forming Ability and Protein Denaturation in Alaska Pollock Frozen Surimi
Source: Hindawi journal article supplement (doi:10.1155/2019/3760368), 2019-07-07
Supplement: f1 [file 3760368.f1.zip]

| Breaking strength (gf) |     |      |      |      |      |
|------------------------|-----|------|------|------|------|
| con                    | 0   | 3    | 6    | 12   | 24   |
|                        | 494 | 1045 | 1188 | 1237 | 1059 |
|                        | 361 | 991  | 1232 | 1327 | 1739 |
|                        | 405 | 811  | 1153 | 1315 | 1438 |
|                        | 322 | 986  |      | 1374 | 1397 |
|                        | 497 | 832  | 1199 | 1206 | 1191 |
|                        | 496 | 908  | 1170 |      | 1385 |
| avg.                   | 429 | 929  | 1188 | 1292 | 1368 |
| std.                   | 70  | 86   | 27   | 61   | 212  |
| 1st F-T                | 0   | 3    | 6    | 12   | 24   |
|                        | 356 | 718  | 912  | 1029 | 1106 |
|                        | 423 | 656  | 626  | 990  | 1273 |
|                        | 387 | 717  | 724  | 989  | 1223 |
|                        | 415 | 746  | 816  | 1176 | 949  |
|                        | 427 | 643  | 700  | 875  | 981  |
|                        | 362 |      | 827  | 988  | 1401 |
| avg.                   | 395 | 696  | 767  | 1008 | 1156 |
| std.                   | 29  | 40   | 94   | 89   | 160  |
| 2nd F-T                | 0   | 3    | 6    | 12   | 24   |
|                        | 352 | 694  | 633  | 1056 | 1194 |
|                        | 344 | 622  | 901  | 1034 | 1281 |
|                        | 362 | 601  | 967  |      | 971  |
|                        | 349 | 596  | 923  |      | 1203 |
|                        | 394 | 699  | 712  | 1125 | 1053 |
|                        | 328 | 614  | 837  | 1020 | 1237 |
| avg.                   | 355 | 637  | 829  | 1059 | 1157 |
| std.                   | 20  | 43   | 119  | 40   | 109  |

error value

| Breaking strain (mm) |      |      |      |      |      |
|----------------------|------|------|------|------|------|
| con                  | 0    | 3    | 6    | 12   | 24   |
|                      | 11.5 | 16.1 | 15.7 | 16.8 | 14.4 |
|                      | 9.14 | 16.2 | 16.7 | 16.6 | 17.4 |
|                      | 10.1 | 14.7 | 16.0 | 15.7 | 15.7 |
|                      | 9.06 | 15.8 |      | 17.1 | 15.6 |
|                      | 11.6 | 14.5 | 16.6 | 15.9 | 14.2 |
|                      | 11.3 | 15.6 | 17.5 |      | 15.2 |
| avg.                 | 10.4 | 15.5 | 16.5 | 16.4 | 15.4 |
| std.                 | 1.1  | 0.6  | 0.6  | 0.5  | 1.0  |
|                      |      |      |      |      |      |
| 1st F-T              | 0    | 3    | 6    | 12   | 24   |
|                      | 8.80 | 12.6 | 15.4 | 15.9 | 14.7 |
|                      | 9.74 | 12.3 | 13.4 | 15.1 | 16.2 |
|                      | 9.14 | 13.2 | 13.3 | 14.3 | 15.4 |
|                      | 9.48 | 13.2 | 14.2 | 15.9 | 14.1 |
|                      | 9.56 | 12.4 | 13.1 | 14.1 | 14.5 |
|                      | 9.38 |      | 14.0 | 14.8 | 17.4 |
| avg.                 | 9.35 | 12.8 | 13.9 | 15.0 | 15.4 |
| std.                 | 0.31 | 0.4  | 0.8  | 0.7  | 1.1  |
|                      |      |      |      |      |      |
| 2nd F-T              | 0    | 3    | 6    | 12   | 24   |
|                      | 8.68 | 13.2 | 13.4 | 15.7 | 15.8 |
|                      | 8.50 | 12.8 | 14.9 | 15.6 | 16.6 |
|                      | 8.82 | 12.0 | 15.1 |      | 13.9 |
|                      | 8.90 | 11.7 | 15.1 |      | 15.7 |
|                      | 9.26 | 12.8 | 13.8 | 15.7 | 14.7 |
|                      | 8.20 | 11.8 | 15.0 | 15.4 | 15.7 |
| avg.                 | 8.73 | 12.4 | 14.6 | 15.6 | 15.4 |
| std.                 | 0.33 | 0.6  | 0.7  | 0.1  | 0.9  |

| Gel stiffness (gf/cm) |     |     |     |     |     |
|-----------------------|-----|-----|-----|-----|-----|
| con                   | 0   | 3   | 6   | 12  | 24  |
|                       | 430 | 650 | 759 | 738 | 737 |
|                       | 395 | 613 | 738 | 798 | 999 |
|                       | 401 | 550 | 720 | 840 | 916 |
|                       | 356 | 626 |     | 805 | 893 |
|                       | 430 | 575 | 724 | 760 | 838 |
|                       | 439 | 583 | 669 |     | 909 |
|                       | 408 | 599 | 722 | 788 | 882 |
| avg.                  | 408 | 599 | 722 | 788 | 882 |
| std.                  | 28  | 34  | 30  | 36  | 80  |
| 1st F-T               | 0   | 3   | 6   | 12  | 24  |
|                       | 404 | 569 | 592 | 645 | 751 |
|                       | 434 | 532 | 469 | 657 | 788 |
|                       | 424 | 544 | 545 | 692 | 794 |
|                       | 438 | 564 | 575 | 738 | 675 |
|                       | 447 | 517 | 534 | 621 | 678 |
|                       | 386 |     | 589 | 667 | 807 |
|                       | 422 | 545 | 551 | 670 | 749 |
| avg.                  | 422 | 545 | 551 | 670 | 749 |
| std.                  | 21  | 19  | 42  | 37  | 54  |
| 2nd F-T               | 0   | 3   | 6   | 12  | 24  |
|                       | 405 | 527 | 472 | 671 | 758 |
|                       | 404 | 486 | 605 | 665 | 772 |
|                       | 410 | 501 | 640 |     | 697 |
|                       | 392 | 509 | 611 |     | 768 |
|                       | 425 | 545 | 516 | 716 | 719 |
|                       | 400 | 519 | 557 | 663 | 788 |
|                       | 406 | 514 | 567 | 679 | 750 |
| avg.                  | 406 | 514 | 567 | 679 | 750 |
| std.                  | 10  | 19  | 58  | 22  | 32  |
