# Supplementary material for: Effects of Freeze-Thaw Cycles on Gel-Forming Ability and Protein Denaturation in Alaska Pollock Frozen Surimi
Source: Hindawi journal article supplement (doi:10.1155/2019/3760368), 2019-07-07
Supplement: f1 [file 3760368.f1.zip]

| Breaking strength (gf) |                  |      |     |     |     |
|------------------------|------------------|------|-----|-----|-----|
| con                    | Setting time (h) | 3    | 6   | 12  | 24  |
|                        |                  | 197  | 365 | 779 | 795 |
|                        |                  | 172  | 400 | 591 | 991 |
|                        |                  | 213  | 572 | 606 | 639 |
|                        |                  | 218  | 490 | 778 | 638 |
|                        |                  | 231  | 459 | 814 | 938 |
|                        | avg.<br>std.     | 516  | 505 | 831 |     |
|                        |                  | 206  | 467 | 679 | 806 |
|                        |                  | 25   | 69  | 116 | 134 |
|                        |                  |      |     |     |     |
| 1st F-T                | Setting time (h) | 3    | 6   | 12  | 24  |
|                        |                  | 124  | 330 | 525 | 644 |
|                        |                  |      | 297 | 413 | 576 |
|                        |                  | 124  | 329 | 495 | 426 |
|                        |                  | 119  | 344 | 533 | 699 |
|                        |                  | 119  | 252 | 582 | 782 |
|                        | avg.<br>std.     | 119  | 320 | 435 |     |
|                        |                  | 121  | 312 | 497 | 675 |
|                        |                  | 2    | 30  | 58  | 155 |
|                        |                  |      |     |     |     |
| 2nd F-T                | Setting time (h) | 3    | 6   | 12  | 24  |
|                        |                  | 97.9 | 305 | 412 | 574 |
|                        |                  | 93.8 | 265 | 492 | 564 |
|                        |                  | 94.8 | 223 | 570 | 669 |
|                        |                  | 95.9 | 286 | 506 | 531 |
|                        |                  |      | 281 | 374 | 604 |
|                        | avg.<br>std.     | 98.9 | 273 | 428 | 524 |
|                        |                  | 96.3 | 272 | 464 | 578 |
|                        |                  | 1.9  | 25  | 66  | 49  |
|                        |                  |      |     |     |     |

| Breaking strain (mm) |                  |      |      |      |      |
|----------------------|------------------|------|------|------|------|
| con                  | Setting time (h) | 3    | 6    | 12   | 24   |
|                      |                  | 13.9 | 14.7 | 19.8 | 17.4 |
|                      |                  | 12.8 | 16.7 | 17.2 | 19.2 |
|                      |                  | 13.1 | 19.6 | 17.0 | 15.3 |
|                      |                  | 12.9 | 17.8 | 19.5 | 15.2 |
|                      |                  | 13.6 | 17.4 | 19.7 | 19.7 |
|                      |                  |      | 18.7 | 15.5 | 17.9 |
|                      |                  | avg. | 13.3 | 17.5 | 18.1 |
|                      |                  | std. | 0.4  | 1.6  | 1.6  |
|                      |                  |      |      |      | 1.7  |
| 1st F-T              | Setting time (h) | 3    | 6    | 12   | 24   |
|                      |                  | 10.0 | 16.7 | 18.1 | 17.2 |
|                      |                  |      | 15.0 | 16.9 | 16.9 |
|                      |                  | 9.66 | 16.8 | 16.8 | 14.3 |
|                      |                  | 8.82 | 16.7 | 17.2 | 18.3 |
|                      |                  | 9.16 | 14.0 | 18.3 | 18.8 |
|                      |                  | 10.3 | 17.4 | 15.8 |      |
|                      |                  | avg. | 9.77 | 16.1 | 17.2 |
|                      |                  | std. | 0.64 | 1.2  | 0.8  |
|                      |                  |      |      |      | 1.8  |
| 2nd F-T              | Setting time (h) | 3    | 6    | 12   | 24   |
|                      |                  | 8.42 | 16.3 | 17.0 | 17.0 |
|                      |                  | 8.14 | 14.4 | 17.5 | 17.8 |
|                      |                  | 8.34 | 13.6 | 19.1 | 18.8 |
|                      |                  | 7.62 | 15.6 | 17.7 | 16.3 |
|                      |                  |      | 15.6 | 16.0 | 17.3 |
|                      |                  | 8.28 | 15.6 | 16.5 | 16.0 |
|                      |                  | avg. | 8.13 | 15.2 | 17.3 |
|                      |                  | std. | 0.27 | 0.9  | 1.0  |
|                      |                  |      |      |      | 0.9  |

|         |                  | Gel stiffness (gf/cm) |     |     |     |     |
|---------|------------------|-----------------------|-----|-----|-----|-----|
| con     | Setting time (h) | 3                     | 6   | 12  | 24  |     |
|         |                  | 142                   | 248 | 394 | 456 |     |
|         |                  | 134                   | 239 | 343 | 516 |     |
|         |                  | 163                   | 291 | 356 | 417 |     |
|         |                  | 169                   | 276 | 399 | 419 |     |
|         |                  | 171                   | 264 | 414 | 475 |     |
|         |                  |                       | 276 | 326 | 465 |     |
|         |                  | avg.                  | 156 | 266 | 372 | 458 |
|         |                  | std.                  | 15  | 18  | 32  | 34  |
|         |                  |                       |     |     |     |     |
| 1st F-T | Setting time (h) | 3                     | 6   | 12  | 24  |     |
|         |                  | 124                   | 198 | 291 | 375 |     |
|         |                  |                       | 198 | 245 | 341 |     |
|         |                  | 129                   | 196 | 295 | 298 |     |
|         |                  | 135                   | 205 | 309 | 383 |     |
|         |                  | 130                   | 180 | 319 | 416 |     |
|         |                  | 116                   | 184 | 276 |     |     |
|         |                  | avg.                  | 127 | 193 | 289 | 363 |
|         |                  | std.                  | 7   | 9   | 24  | 40  |
|         |                  |                       |     |     |     |     |
| 2nd F-T | Setting time (h) | 3                     | 6   | 12  | 24  |     |
|         |                  | 116                   | 187 | 242 | 337 |     |
|         |                  | 115                   | 184 | 281 | 317 |     |
|         |                  | 114                   | 164 | 298 | 356 |     |
|         |                  | 126                   | 183 | 286 | 326 |     |
|         |                  |                       | 181 | 234 | 350 |     |
|         |                  | 119                   | 176 | 260 | 327 |     |
|         |                  | avg.                  | 118 | 179 | 267 | 335 |
|         |                  | std.                  | 4   | 8   | 23  | 14  |
|         |                  |                       |     |     |     |     |
