# Supplementary material for: Effects of Freeze-Thaw Cycles on Gel-Forming Ability and Protein Denaturation in Alaska Pollock Frozen Surimi
Source: Hindawi journal article supplement (doi:10.1155/2019/3760368), 2019-07-07
Supplement: f1 [file 3760368.f1.zip]

Archive with 11 entries (11 files):
- S-Figure 1(a) Breaking strength raw data (Setting gel).pdf
- S-Figure 1(b) Breaking strain raw data (Setting gel).pdf
- S-Figure 2(a) Calculation process of Gel stiffness (Setting gel).pdf
- S-Figure 2(b) Correlation diagram between breaking strength and gel stiffness (Setting gel).pdf
- S-Figure 3(a) Breaking stength raw data (Double heated gel).pdf
- S-Figure 3(b) Breaking strain raw data (Double heated gel).pdf
- S-Figure 4(a) Calculation process of Gel stiffness (Double heated gel).pdf
- S-Figure 4(b) Correlation diagram between breaking strength and gel stiffness (double-heated gel).pdf
- S-Figure 5 & Table 1 Changes in MHC residual rate and 150 kDa band of suwari gel prepared from each frozen surimi with setting time.pdf
- S-Figure 6 & Table 1 Changes in MHC residual rate and 150 kDa band of direct and two-step heated gel prepared from each frozen surimi with setting time.pdf
- S-Figure 7 Ca-ATPase activity raw data.pdf
